# 1 *Coxiella burnetii* epitope-specific T-cell responses in chronic Q fever patients

2

## 3 **Short title**

4 Epitope-specific T-cell responses in chronic Q fever

5

## 6 **Authors**

7 Anja Scholzen<sup>1+</sup>, Guilhem Richard<sup>2</sup>, Leonard Moise<sup>2,3</sup>, Eva Hartman<sup>1</sup>, Chantal P. Bleeker-  
8 Rovers<sup>4</sup>, Patrick M. Reeves<sup>5</sup>, Susan Raju Paul<sup>5</sup>, William D. Martin<sup>2</sup>, Anne S. De Groot<sup>2,3</sup>, Mark  
9 C. Poznansky<sup>5</sup>, Ann E. Sluder<sup>5\*+</sup>, Anja Garritsen<sup>1\*+</sup>

10

11 \*AES and AG contributed equally to this study

12 <sup>+</sup> Email addresses corresponding authors:

13 [anja.scholzen@innatoss.com](mailto:anja.scholzen@innatoss.com); [asluder@mgh.harvard.edu](mailto:asluder@mgh.harvard.edu); [anja.garritsen@innatoss.com](mailto:anja.garritsen@innatoss.com)

14

## 15 **Affiliations**

16 <sup>1</sup>InnatOss Laboratories B.V., Oss, Netherlands

17 <sup>2</sup>EpiVax, Inc., Providence, Rhode Island, United States of America

18 <sup>3</sup>Institute for Immunology and Informatics, Department of Cell and Molecular Biology,  
19 University of Rhode Island, Providence, Rhode Island, United States of America

20 <sup>4</sup> Radboud Expertise Center for Q Fever, Department of Internal Medicine, Radboud university  
21 medical center, Nijmegen, The Netherlands

22 <sup>5</sup> Massachusetts General Hospital, Vaccine and Immunotherapy Center, Boston, Massachusetts,  
23 United States of America

## 24 **Abstract**

25 Infection with *Coxiella burnetii*, the causative agent of Q fever, can result in life-threatening  
26 persistent infection. Reactogenicity hinders worldwide implementation of the only licensed  
27 human Q fever vaccine. We previously demonstrated long-lived immunoreactivity in individuals  
28 with past symptomatic and asymptomatic *Coxiella* infection (convalescents) to promiscuous  
29 HLA-class II *C. burnetii* epitopes, providing the basis for a novel T-cell-targeted subunit  
30 vaccine. Here we investigated in a cohort of 22 individuals with persistent infection (chronic Q  
31 fever) whether they recognize the same set of epitopes, or distinct epitopes that could be  
32 candidates for a therapeutic vaccine or aid in the diagnosis of persistent infection.

33 Individuals with chronic Q fever showed strong class II epitope-specific cultured ELISpot  
34 responses largely overlapping with the peptide repertoire identified previously for convalescents.  
35 Five additional peptides were recognized more frequently by chronic subjects, but there was no  
36 combination of epitopes uniquely recognized by or non-reactive in chronic Q fever subjects.  
37 Consistent with more recent/prolonged exposure, we found, however, stronger direct *ex vivo*  
38 responses to whole-cell *C. burnetii* and individual peptides in direct ELISpot than in  
39 convalescents.

40 In conclusion, we have validated and expanded a previously published set candidate epitopes for  
41 a novel T-cell targeted subunit Q fever vaccine in the context of chronic Q fever patients and  
42 demonstrated that they successfully mounted a T-cell response comparable to that of  
43 convalescents. Finally, we demonstrate that individuals treated for chronic Q fever mount a  
44 broader *ex vivo* response to class II epitopes than convalescents, which could be explored for  
45 diagnostic purposes.

## 46 **Introduction**

47 Q fever is a zoonotic disease that is endemic in many countries worldwide. It is caused by the  
48 environmentally highly stable small Gram-negative coccobacillus *Coxiella burnetii*, which is  
49 transmitted to humans predominantly by aerosol from infected ruminants such as goats, sheep  
50 and cattle (1). Outbreaks usually occur in the occupational setting including the livestock  
51 industry and deployed military personnel (1). *Coxiella* outbreaks can also occur in the general  
52 population, the largest to date being the outbreak in the Netherlands from 2007-2010 with an  
53 estimated 40,000 infections at the center of the epidemic area alone (2). While infection remains  
54 asymptomatic in an estimated 50-60% of individuals and acute symptomatic infection is readily  
55 treatable with antibiotics, a large proportion (10-20%) of individual with acute Q fever later  
56 develop Q fever fatigue syndrome. Further, 1-5% of (often asymptotically) infected  
57 individuals progress to persistent infection also known as chronic Q fever. Chronic Q fever has a  
58 poor prognosis and manifests as endocarditis, infected aneurysms or vascular prosthesis infection  
59 in individuals with specific risk factors (1, 3).

60

61 While Q fever infection in humans can be prevented by vaccination using Q-VAX®, an  
62 inactivated whole cell vaccine based on phase I *C. burnetii*, it is licensed for use in Australia  
63 only. Importantly, this vaccine requires pre-vaccination screening for prior exposure due to  
64 reported side effects in previously exposed individuals (3-5). In this context, the objective of the  
65 Q-VaxCelerate consortium is to develop a novel non-reactogenic T-cell-targeted human Q fever  
66 vaccine that does not require pre-screening of vaccinees, rationally selecting T-cell epitopes for  
67 inclusion in such a vaccine (5, 6). Using immunoinformatically predicted T-cell epitopes derived  
68 from *C. burnetii* sero-reactive and type IV secretion systems (TSS4) substrate proteins, we  
69 previously analyzed antigenicity in naturally infected subjects with past symptomatic or

70 asymptomatic *C. burnetii* infection; these are here-after referred to as ‘convalescents’ since  
71 infection was cleared. In these naturally exposed subjects, we demonstrated long-lived  
72 immunoreactivity to promiscuous CD4 T-cell epitopes, while HLA class I epitope responses  
73 were sparse in this cohort (7). One possible explanation for the latter was that class I responses  
74 might have contracted faster than class II responses, as previously observed following smallpox  
75 infection or vaccination and tuberculosis treatment (8-11). In this initial study, there were no  
76 striking differences between past asymptomatic or symptomatic infected individuals, all of  
77 whom successfully cleared acute *C. burnetii* infection. The question remains, however, as to  
78 whether analogous to herpes simplex virus infection, there might be distinct epitope-specific T-  
79 cell repertoires for individuals that either successfully control infection or develop persistent  
80 infection (12). Such epitopes might be interesting targets for a potentially separate therapeutic  
81 vaccine to accelerate bacterial clearance in chronic Q fever, or aid in the diagnosis of this  
82 persistent infection.

83

84 In the present study we therefore analyzed T-cell reactivity to the same set of epitopes in a  
85 cohort of subjects diagnosed and treated for persistent *C. burnetii* infection (chronic Q fever).  
86 The aim was to investigate whether subjects with chronic Q fever (i) show potentially greater  
87 reactivity to class I epitopes given their more recent exposure, (ii) recognize the same or a  
88 distinct set of class II epitopes and (iii) differ in their effector memory T-cell response profile  
89 compared to individuals with resolved acute symptomatic or past asymptomatic infection.

## 90 **Results**

### 91 **Chronic Q fever subjects have cultured ELISpot response patterns to HLA class I and II C.** 92 ***burnetii* epitopes comparable to that of convalescent subjects**

93 A group of 22 individuals with proven (n=16) and probable (n=6) chronic Q fever consented for  
94 participation in this study (Table 1). All but two chronic Q fever subjects still had phase I IgG  
95 titers of  $\geq 1024$  at inclusion into the study (median with interquartile range: 4096 [1536-8192]),  
96 and 13/16 proven and 1/6 probable subjects were still undergoing antibiotic treatment. For  
97 analysis of T-cell epitope-specific responses in the chronic Q fever cohort, preference was given  
98 to individuals with proven chronic Q fever who were diagnosed in 2016 or later and still  
99 undergoing antibiotic treatment. Subjects were scheduled for blood collection based on  
100 availability for class I and II peptide screening (Table 1). In total, 13 proven and one probable  
101 chronic Q fever patients were tested for promiscuous class II epitope-specific responses (Table  
102 S1), and 10 proven and three probable chronic Q fever patients for class I epitope-specific  
103 responses (Table S2). HLA typing of the two selected groups showed supertype distributions  
104 largely comparable to expected frequencies in the general population and/or those in the  
105 previously analyzed convalescent groups (Table S3 and S4), except for an underrepresentation of  
106 HLA-DR11, A11 and B8 and an overrepresentation of HLA-A3 superotypes, which may be  
107 partially attributed to the small group sizes.

108  
109 T-cell responses were first analyzed by cultured IFN $\gamma$  ELISpot, which both enhances detection of  
110 low frequency responses and preferentially measures central memory T-cells (13). Similar to  
111 previous observations for convalescent *C. burnetii*-exposed subjects, 9/14 chronic Q fever  
112 patients (64%) showed responses to 3-14 HLA class II peptides per donor (Figure 1A), while  
113 responses to HLA class I peptides were rare, with only three subjects showing responses to one

114 or two peptides each (Figure 1B). When directly comparing the data from the chronic Q fever  
115 cohort to convalescent subjects (asymptomatic, n=33; and symptomatic, n=23), there was no  
116 statistically significant difference in the breadth of the class II response per subject between  
117 either all chronic and all convalescent subjects (p=0.15 by Mann-Whitney test), or chronic  
118 subjects on the one hand and convalescent symptomatic or asymptomatic subjects on the other  
119 hand (p=0.90 and p=0.16 by Kruskal-Wallis test with Dunn's multiple comparison post hoc test)  
120 (Figure 2A). Nevertheless, chronic subjects had the smallest proportion of non-responders  
121 amongst the three groups (Figure 2B).

122  
123 Both the overall breadth of responses and the responses to individual class II peptides largely  
124 overlapped between chronic and convalescent subjects: In total, 33/50 HLA class II peptides  
125 were recognized by at least 1/14 chronic subjects; comparable to the fraction (28/50) of HLA  
126 class II peptides recognized by a similar proportion (at least 4/56, 7.14%) of convalescent  
127 individuals. The same 22 peptides were recognized in both cohorts by at least 7% of the subjects.  
128 The peptides that were not recognized by any individual in the chronic cohort included 5/6  
129 peptides that were also not recognized by any convalescent subject (p11, p34, p35, p40 and p49,  
130 Figure 3).

131  
132 More importantly, out of 21 highly antigenic HLA class II peptides that were previously found to  
133 be recognized by >10% of all convalescent individuals (at least 6/56), 15 were also recognized  
134 by >10% of chronic subjects (at least 2/14 and up to 6/14 = 42%; Figure 3). This included at  
135 least one epitope from each of the five source proteins that were represented by two highly  
136 antigenic epitopes each in the convalescent cohort (p14+p15, CBU\_1835/protoporphyrinogen  
137 oxidase; p18+p19, CBU\_1513/protoporphyrinogen oxidase; p22+p23, CBU\_1398/SucB,

138 p37+p38, CBU\_0718, p45+p46, CBU\_0307/outer membrane protein). Another five of these 21  
139 highly antigenic peptides were recognized by 1/14 chronic subjects. Only a single peptide that  
140 was highly antigenic in convalescents (p21 from CBU\_1416/repressor protein C2), was not  
141 recognized by any chronic subject tested; however, 5/14 chronic individuals did recognize a  
142 second peptide (p2) from the same source protein.

143

144 Many of the class II peptide responses were at least as frequent in chronically infected subjects  
145 as in convalescents, and despite the large difference in group sizes, responses to six class II  
146 peptides were statistically significantly more frequent in chronic subjects (p6, p7, p16, p20, p30  
147 and p47; Figure 3). All of these six peptides were recognized by four to five individuals (28-  
148 36%) within the chronic cohort, while for five of these peptides (all but p30), the frequency of  
149 responses in the convalescent cohort was <10% (two to five out of 56 subjects). However, for 3/5  
150 peptides to which >10% chronic subjects but <10% convalescents reacted, >10% convalescents  
151 did show a response to a second epitope from the same source protein. Finally, there was only a  
152 single peptide (p9, the single screened epitope from the hypothetical exported protein  
153 CBU\_2065) that was recognized by one chronic subject but not a single individual in the  
154 convalescent cohort. Taken together, while (central memory) cultured ELISpot responses to  
155 some individual peptides are more frequent in chronic subjects, there is no strong evidence for a  
156 set of source proteins or epitopes for which responses are uniquely present or absent in subjects  
157 with chronic Q fever.

158

159 **Chronic Q fever subjects show more frequent direct ELISpot responses to HLA class II C.**  
160 ***burnetii* epitopes than convalescent subjects**

161 Given that subjects treated for chronic Q fever had a more recent and prolonged exposure to *C.*  
162 *burnetii*, we hypothesized that these individuals might also show a stronger effector memory T-  
163 cell response profile compared to individuals with resolved acute Q fever or past asymptomatic  
164 infection. Indeed, the individuals with chronic Q fever enrolled in this study showed significantly  
165 higher IFN $\gamma$  secretion measured following whole blood stimulation with heat-killed whole-cell  
166 *C. burnetii* (strain Cb02629) compared to convalescent subjects (Table 1, Figure S1A).  
167 Stimulation of freshly isolated PBMCs for direct ELISpot with whole-cell *C. burnetii* indicated  
168 that this was at least partially due to a higher frequency of responding cells, with significantly  
169 higher numbers of spot forming units and higher stimulation indices in chronic compared to  
170 convalescent subjects (Figure S1B-C). Multiplex cytokine analysis of supernatants from whole  
171 blood stimulation revealed that the greater *ex vivo* response was not just confined to IFN $\gamma$ , but  
172 also evident for IL-2 responses to whole-cell heat-killed *C. burnetii* (Figure S2A). The ratio  
173 between IFN $\gamma$  and IL-2 responses in chronic subjects did not differ from that found for  
174 convalescent subjects (Figure S2A) IL-10 responses, in contrast, were lower in the chronic Q  
175 fever cohort, and innate TNF $\alpha$  and IL-1 $\beta$  responses did not differ between chronic and  
176 convalescent subjects (Figure S2B).

177

178 For a subset of chronic and convalescent individuals we next analyzed by direct ELISpot  
179 whether HLA class II *C. burnetii*-specific peptide responses would also be more readily detected  
180 in chronic patients. This assay preferentially measures effector memory responses (13). The  
181 proportion of individuals with direct ELISpot responses in both cohorts was comparable, with  
182 5/11 responding convalescent individuals and 7/13 chronic subjects (Figure 4). However, the  
183 breadth of the response was larger for chronic subjects: one of the seven responding chronic  
184 subject showed *ex vivo* responses to four class II peptides and another four subjects scored



185 positive for 6-12 class II peptides. In contrast, only one of the responding convalescent subjects  
186 recognized four peptides and the remaining three individuals only one to two peptides. All but  
187 one chronic subject and all convalescent individuals with detectable responses by direct ELISpot  
188 also showed responses by cultured ELISpot, and the individual peptides recognized in both  
189 assays per donor largely overlapped between these two groups (Figure S3 and S4). Although  
190 there were three peptides that elicited direct re-call responses with a relatively high proportion of  
191 individuals exclusively in the chronic group (p7 in 4/13; p10 and p19 in 3/13), this difference did  
192 not reach statistical significance by Fisher's exact test, given the small number (n=11) of  
193 convalescent subjects also tested. Amongst convalescent subjects, the only peptides recognized  
194 by more than one individual were p4 and p38, two of the highly reactive peptides in the cultured  
195 ELISpot assay.

## 196 **Discussion**

197 In this study we compared the repertoire of HLA class II T-cell epitopes recognized by subjects  
198 treated for persistent *C. burnetii* infection (chronic Q fever) with those recognized by  
199 convalescent individuals (i.e. those with resolved past acute or asymptomatic infection) in our  
200 previous study (7). We find that individuals treated for chronic Q fever have effectively  
201 generated a central memory *C. burnetii*-specific T-cell response, as measured by cultured  
202 ELISpot, that closely resembles that of convalescent patients. This includes both the breadth and  
203 the individual HLA class II epitopes recognized, as well as the near absence of detectable  
204 responses to HLA class I peptides. The main differences between the two cohorts were that  
205 compared to convalescents chronic Q fever subjects showed a higher proportion of cultured  
206 ELISpot responses to a small subset of six promiscuous CD4 T-cell epitopes, and exhibited  
207 detectable effector memory responses, as measured by direct ELISpot, to a greater number of  
208 peptides per subject. Both are consistent with more recent and prolonged antigen exposure in the  
209 chronic Q fever subjects.

210

211 Our study provides validation of the highly antigenic potential of the previously identified 22  
212 promiscuous HLA class II peptides and the identification of an additional five *C. burnetii* HLA  
213 class II epitopes (p6, p7, p16, p20 and p47). These five peptides were recognized by four to five  
214 individuals (28-36%) within the chronic cohort, highlighting their strong antigenic potential at  
215 least during/ shortly after infection. Bearing in mind the small size of the group of chronic  
216 patients evaluated, the fact that all but one of the epitopes found to be highly antigenic in  
217 convalescent subjects (recognized by >10% individuals) were also recognized by at least one  
218 subject in the chronic cohort further indicates that at least amongst this set of screened HLA class  
219 II epitopes, there is no unique set of peptides to which responses would be absent in persistently

220 infected individuals, and that would warrant consideration for a separate therapeutic vaccine for  
221 chronic Q fever patients. These results for chronic Q fever are in contrast to the observation of  
222 “asymptomatic” epitopes in herpes simplex virus infection (12). The principle difference may be  
223 that unlike Q fever, herpes simplex infection is always considered a persistent infection but can  
224 remain asymptomatic nonetheless. Instead, the same set of promiscuous HLA class II epitopes  
225 identified previously in the convalescent cohort (7) could in principle be used to further boost  
226 already primed T-cell responses in individuals with persistent infection. Whether this would  
227 speed up resolving of infection in this patient group, however, is unclear. Evidently, the IFN $\gamma$  re-  
228 call response of circulating T-cells in individuals with chronic Q fever is fully functional – both  
229 in response to individual epitopes and whole-cell *C. burnetii*. This is in line with previous studies  
230 using IFN $\gamma$  ELISA following whole blood stimulation (14, 15) and ELISpot using freshly  
231 isolated PBMCs (16). If this strong IFN $\gamma$  response is insufficient to promote clearance of  
232 infection foci by activating *C. burnetii*-infected monocytes/macrophages then the defect could be  
233 downstream of IFN $\gamma$  signaling as proposed previously (14). In particular, antigen-presenting cell  
234 maturation, function and interaction with T-cells as mediated via the IFN-IL-12p40 feedback  
235 loop (14, 17-19) in foci of infection could be compromised in persistent infection. Therefore,  
236 further research is required to clarify whether chronic Q fever patients can benefit from a  
237 therapeutic vaccine, or whether a completely different approach is needed to achieve clearance in  
238 this population.

239

240 The results of this study indicate that the unexpected scarcity of detectable responses to the  
241 predicted HLA class I epitopes in convalescent subjects (7) is not simply due to the long time-  
242 lapse between initial exposure and T-cell assays in our previous study, given that the chronic  
243 subjects analyzed here were exposed to *C. burnetii* antigens until much more recently. An

244 obvious potential confounder in this chronic Q fever cohort is the fact that these subjects had  
245 been diagnosed and received antibiotic treatment for various lengths of time. Heterogeneity in  
246 time since diagnosis and in the duration of ongoing treatment, however, was minimized during  
247 selection of individuals for epitope screening. Moreover, a previous study showed that duration  
248 of antibiotic treatment following diagnosis of chronic Q fever, and whether subjects received  
249 treatment or not, did not influence IFN $\gamma$  secretion, at least not in a whole blood stimulation assay  
250 using whole-cell *C. burnetii* (14). Of note, CD8 responses have been shown to decline rapidly  
251 following *Mycobacterium tuberculosis* treatment (10, 11) and we cannot exclude that this might  
252 have also impacted class I responses in the present cohort. The question whether and which  
253 class I epitopes should be included in a T-cell targeted Q fever vaccine for humans therefore  
254 requires further investigation during a new outbreak or a vaccination campaign.

255

256 In line with the observed higher frequency of circulating effector T-cell responding directly *ex*  
257 *vivo* to *C. burnetii* epitopes as well as whole-cell *C. burnetii* in these persistently infected  
258 individuals, we not only find stronger IFN $\gamma$  responses, but also significantly higher IL-2  
259 production in chronic compared to convalescent individuals. IL-2 is mainly produced by antigen-  
260 specific activated CD4 T-cells shortly after T-cell receptor engagement (20). Of note, these  
261 results contrast with a previous study that found lower IL-2 secretion in response to whole-cell  
262 *C. burnetii* and elevated IFN $\gamma$ /IL-2 ratio in patients with chronic Q fever. This finding was  
263 hypothesized to reflect increased numbers of circulating effector T-cells producing IFN $\gamma$  and low  
264 amounts of IL-2 (14). However, a simple supernatant secretion assay does not distinguish  
265 whether different cytokines are produced by the same or different cell populations, and central  
266 memory T-cells can also co-produce two or more cytokines including IL-2 (21). A possible  
267 technical explanation for the discrepancy between the two studies in regards to IL-2 secretion

268 and IFN $\gamma$ /IL-2 ratio is that in the previous study IL-2 responses were assessed after 48 h rather  
269 than 24 h stimulation (14), which may have impacted measurement of this rapidly consumed  
270 growth factor. Moreover, while individuals in both studies were recruited from the same region  
271 and all were likely initially exposed during the 2007-2011 outbreak, patients for the other study  
272 were assessed approximately 5 years earlier. Thus, cellular responses assessed herein have likely  
273 further contracted in convalescents since their initial exposure, potentially to different degrees  
274 for each cytokine. Infection and thus antigen exposure in chronic patients, in contrast, was  
275 persistent and hence longer. Whether the longer clinical pre-patency in our cohort might  
276 potentially relate to stronger IL-2 responses can only be speculated and requires investigation in  
277 a larger, specifically designed study.

278

279 One obvious question arising from this limited dataset is whether direct *ex vivo* responses to  
280 specific epitopes such as p7, p10, and p19, which were confined to the chronic cohort, might be  
281 of diagnostic value. This would require evaluation of a much larger cohort of past exposed  
282 individuals and (ideally recently diagnosed) chronic Q fever cases and a separate group of  
283 subjects with acute Q fever or recently recovered individuals. Only then will it be possible to  
284 determine whether *ex vivo* responses to these epitopes correlate with persistent infection, or  
285 simply with recent exposure. To be of value as a diagnostic tool, coverage of subjects would  
286 have to be greater than the currently observed 23-30%. Otherwise, the assay would at best be of  
287 supporting value in addition to the existing set of PCR, serology and scanning techniques to  
288 localize infection.

289

290 In conclusion, we herein validate and expand the characterization of a previously published set  
291 of promiscuous *C. burnetii*-specific HLA class II T-cell epitope clusters as candidates for a novel

292 T-cell targeted subunit Q fever vaccine. We find that chronic Q fever patients have mounted a  
293 central memory re-call T-cell response comparable to that of convalescent individuals. Finally,  
294 we demonstrate that individuals treated for chronic Q fever mount a broader *ex vivo* response to  
295 class II epitopes, which could be explored for diagnostic purposes.

## 296 **Materials and Methods**

### 297 **Study population**

298 Twenty-two participants were recruited who were receiving or had received treatment for  
299 chronic Q fever or persistent focalized infection at the outpatient clinics of the Radboud  
300 university medical center in Nijmegen, the Elisabeth Hospital in Tilburg, the Jeroen Bosch  
301 Hospital in 's-Hertogenbosch, the Bernhoven Hospital in Uden, the Medisch Spectrum Twente  
302 hospital in Twente, the Medical University Centre in Maastricht and the Zuyderland Medical  
303 Center in Heerlen, the Netherlands. The chronic Q fever group comprised 16 proven and 6  
304 probable chronic Q fever patients diagnosed according to the Dutch consensus guideline on  
305 chronic Q fever (22). Ten of the proven chronic Q fever patients presented with a vascular focus  
306 in an aneurysm or aortic prosthesis, one with endocarditis, one with both a vascular and valvular  
307 localization, one with both vascular and vertebrae foci, one with lesions in the lung and an  
308 aneurysm, one with a focus in vertebrae only and one with a positive PCR. Thirteen of the  
309 proven patients and one of the probable cases were still on antibiotic treatment at the time of  
310 inclusion into this study (Table 1). At inclusion into the study, all participants treated for chronic  
311 Q fever completed a medical questionnaire and donated blood for HLA typing and analysis of  
312 serological and cellular responses to whole-cell *C. burnetii*.

313

314 *C. burnetii*-specific cultured ELISpot responses determined for this chronic Q fever cohort were  
315 compared to previously published results (7) from past exposed individuals with a history of  
316 resolved asymptomatic or symptomatic Q fever infection who recruited from the village of  
317 Herpen, the Netherlands, one of the focal centers of the 2007-2010 Q fever outbreak (23, 24).  
318 Additional assays presented in the present study (direct ELISpot responses and cytokine release

319 during whole blood stimulation) were conducted using a subgroup from this cohort of  
320 convalescent Q fever exposed individuals from Herpen.

321

322 The study was reviewed and approved by the Medical Ethical Committee Brabant (Tilburg,  
323 Netherlands, NL51305.028.15) and all participants provided written informed consent.

324

### 325 **HLA-typing, serological and cellular responses to whole-cell *C. burnetii* at inclusion**

326 HLA typing was performed at the HLA laboratory at the Laboratory of Translational  
327 Immunology at the UMC Utrecht, the Netherlands, by Next Generation Sequencing and the  
328 resulting HLA-A, HLA-B, and HLA-DRB1 alleles were assigned to supertype families as  
329 described previously (7).

330

331 IgG and IgM antibody titers for phase I and phase II *C. burnetii* were determined by  
332 immunofluorescence assay (Focus Diagnostics) at the Jeroen Bosch Hospital, 's-Hertogenbosch,  
333 the Netherlands.

334

335 Cellular responses were determined by whole blood IFN $\gamma$  release assay (Q-detect<sup>TM</sup> IGRA),  
336 using lithium-heparin anti-coagulated blood stimulated with *C. burnetii* antigen (heat killed  
337 Cb02629, Wageningen Bioveterinary Research, lot 14VRIM014) and appropriate positive and  
338 negative controls, as described previously (7). In addition to IFN $\gamma$  ELISA, multiplex cytokine  
339 analysis of whole blood stimulation supernatants for IFN $\gamma$ , IL-2, IL-10, TNF $\alpha$  and IL-1 $\beta$  was  
340 conducted using the Human Proinflammatory Panel 1 V-Plex assay (Mesoscale Discovery),  
341 according to the manufacturers' recommendations. Of note, the V-Plex assay uses a different



342 standard than the Q-detect ELISA, resulting in an approximately 20-fold difference in calculated  
343 IFN $\gamma$  concentrations.

344

### 345 **Analysis of *C. burnetii* epitope-specific T-cell responses**

346 Antigen-specific T-cell responses to *C. burnetii* were determined by enzyme-linked immune spot  
347 (ELISpot) assay using previously published 50 broadly promiscuous HLA class II epitope  
348 clusters (Supplementary Table S1) and 65 HLA class I epitopes (Supplementary Table 2). As  
349 described previously (7), these 115 epitopes were derived by immunoinformatic prediction using  
350 the iVAX toolkit developed by EpiVax ([http://epivax.com/immunogenicity-screening/ivax-web-](http://epivax.com/immunogenicity-screening/ivax-web-based-vaccine-design)  
351 [based-vaccine-design](http://epivax.com/immunogenicity-screening/ivax-web-based-vaccine-design)) (25, 26) from two sets of *C. burnetii* antigens: type IV secretion system  
352 substrates (T4SS) expected to elicit CD8 responses and known sero-reactive *C. burnetii* antigens  
353 based on antibody responses in humans and mice.

354

355 Two different ELISpot assays were employed to facilitate detection of central memory T-cell  
356 responses (cultured ELISpot) and effector memory T-cell responses (standard or direct ELISpot)  
357 (13). ELISpot was conducted using freshly isolated peripheral blood mononuclear cells (PBMCs)  
358 from lithium-heparin anti-coagulated blood, using Leukosep tubes prefilled with Ficoll (Greiner  
359 BioOne) according to the manufacturer's recommendations. ELISpot assays were conducted  
360 based on a published protocol, using MultiScreen IP filter plates (Merck Millipore) and a human  
361 IFN- $\gamma$  ELISPOT antibody and reagent set (Diaclone) to detect responses to individual peptides in  
362 quadruplicate (final concentration 2  $\mu$ g/ml per peptide, 0.02% DMSO) (7). Plates were scanned  
363 on an AID Classic reader system and spot forming units counted using the AID ELISpot  
364 software v7.0 (both AID Diagnostika GmbH). Statistical analyses were carried out using  
365 GraphPad Prism software (version 7).

366

367 For detection of *C. burnetii*-specific central memory T-cell responses and to increase sensitivity  
368 for low frequency antigen-specific T-cells, ELISpot was preceded by antigen-specific T-cell  
369 expansion with peptide pools (7). Based on cell availability, a median of 41,000 cells per  
370 expansion culture (interquartile range (IQR) 32,000-51,000) were plated per replicate well for  
371 chronic Q fever subjects and data were analyzed as described previously using three combined  
372 threshold criteria (7): Cultured ELISpot peptide re-stimulation responses were defined as positive  
373 when they were (i) significantly higher than spot counts in matched negative control wells from  
374 the same expansion culture by one-way ANOVA with Holm-Šídák multiple comparison  
375 correction post-hoc test, reached (ii) a stimulation index of at least 2 above the matched negative  
376 control wells and (iii) an absolute cut-off of >10 SFU/well.

377

378 For direct ELISpot, epitope-specific HLA class II responses were evaluated *ex vivo* without prior  
379 culture or expansion for all chronic individuals with a sufficiently large number of PBMCs  
380 available (n=13), and for a subset of convalescent individuals (n=11). Due to the expected lower  
381 pre-cursor frequency in fresh PBMCs and based on cell availability, a median of 215,000 cells  
382 (interquartile range (IQR) 115,000-331,000) were plated per replicate well for chronic Q fever  
383 and convalescent subjects. In addition to peptide stimulation, duplicate wells of PBMCs were  
384 also stimulated with whole cell heat-killed *C. burnetii* antigen (strain Cb02629) at the same  
385 concentration as used for whole blood stimulations in Q-detect<sup>TM</sup>. The threshold criteria for a  
386 positive response in the direct ELISpot assay were (i) spot counts significantly higher than those  
387 in matched negative control wells from the same donor by one-way ANOVA with Holm-Šídák  
388 multiple comparison correction post-hoc test, (ii) responses that reached a stimulation index of at

389 least 2 above the matched negative control wells and (iii) an absolute cut-off of 10 SFU/million  
390 cells.

## 391 **Acknowledgements**

392 We would like to thank all chronic Q fever patients as well as the volunteers from the village of  
393 Herpen, The Netherlands, for their participation in this study. We acknowledge the patient  
394 organizations Q-support and Q-uestion and the following physicians for their assistance in  
395 recruiting chronic Q fever patients into this study: M van Kasteren (Elisabeth-TweeSteden  
396 Hospital Tilburg) and A. Olde Loohuis. P. Hindocha is acknowledged for assistance with HLA  
397 supertype assignment.

398

399 This research was supported by contract HDTRA1-15-C-0020 from the US Defense Threat  
400 Reduction Agency ([www.dtra.mil](http://www.dtra.mil)), awarded to Massachusetts General Hospital (MGH; MCP  
401 Lead Principal Investigator); work by authors at other institutions was supported by subcontracts  
402 under the prime contract award to MGH. The funder had no role in study design, data collection,  
403 analysis or interpretation of the data, the preparation of the manuscript, or the decision to submit  
404 the work for publication.

405

406 AG is a senior officer and shareholder and AS is an employee of Innatoss Laboratories B.V.,  
407 which provides diagnostic screening for Q fever. ADG and WM are senior officers and  
408 shareholders, and LM and GR are employees of EpiVax, Inc., a company specializing in  
409 immunoinformatic analysis. Innatoss Laboratories B.V. and EpiVax, Inc., own patents to  
410 technologies utilized by associated authors in the research reported here. The remaining authors  
411 declare that the research was conducted in the absence of any commercial or financial  
412 relationships that could be construed as a potential conflict of interest.

413

414 AS, PMR, MCP, AES and AG formulated research goals; AS and AG designed experiments; EH  
415 collected clinical data; CPBR supported patient recruitment; SRP advised on patient selection  
416 and reviewed clinical data; AS conducted experiments and analyzed data; AG, WDM and ADG  
417 contributed vital reagents and computing tools; LM and GR performed immunoinformatic  
418 epitope predictions and selection; GR analyzed HLA supertypes; AS and AG interpreted the data  
419 and wrote the manuscript; GR, LM, EH, CPBR, PMR, SRP, WDM, ADG, MCP and AES  
420 discussed data and critically revised the manuscript. All authors read and approved the final  
421 manuscript.

## 422 References

- 423 1. Eldin C, Melenotte C, Mediannikov O, Ghigo E, Million M, Edouard S, Mege JL, Maurin M, Raoult  
424 D. 2017. From Q Fever to *Coxiella burnetii* Infection: a Paradigm Change. *Clin Microbiol Rev*  
425 30:115-190.
- 426 2. Kampschreur LM, Hagens JC, Wielders CC, Elsman P, Lestrade PJ, Koning OH, Oosterheert JJ,  
427 Renders NH, Wever PC. 2013. Screening for *Coxiella burnetii* seroprevalence in chronic Q fever  
428 high-risk groups reveals the magnitude of the Dutch Q fever outbreak. *Epidemiol Infect* 141:847-  
429 51.
- 430 3. Kampschreur LM, Oosterheert JJ, Hoepelman AI, Lestrade PJ, Renders NH, Elsman P, Wever PC.  
431 2012. Prevalence of chronic Q fever in patients with a history of cardiac valve surgery in an area  
432 where *Coxiella burnetii* is epidemic. *Clin Vaccine Immunol* 19:1165-9.
- 433 4. Marmion BP, Ormsbee RA, Kyrkou M, Wright J, Worswick DA, Izzo AA, Esterman A, Feery B,  
434 Shapiro RA. 1990. Vaccine prophylaxis of abattoir-associated Q fever: eight years' experience in  
435 Australian abattoirs. *Epidemiol Infect* 104:275-87.
- 436 5. Ruiz S, Wolfe DN. 2014. Vaccination against Q fever for biodefense and public health indications.  
437 *Front Microbiol* 5:726.
- 438 6. Reeves PM, Paul SR, Sluder AE, Brauns TA, Poznansky MC. 2017. Q-vaxcelerate: A distributed  
439 development approach for a new *Coxiella burnetii* vaccine. *Hum Vaccin Immunother* 13:2977-  
440 2981.
- 441 7. Scholzen A, Richard G, Moise L, Baeten LA, Reeves PM, Martin WD, Brauns TA, Boyle CM, Raju  
442 Paul S, Bucala R, Bowen RA, Garritsen A, De Groot AS, Sluder AE, Poznansky MC. 2019.  
443 Promiscuous *Coxiella burnetii* CD4 epitope clusters associated with human recall responses are  
444 candidates for a novel T-cell targeted multi-epitope Q fever vaccine. *Front Immunol* 10:207.
- 445 8. Amara RR, Nigam P, Sharma S, Liu J, Bostik V. 2004. Long-lived poxvirus immunity, robust CD4  
446 help, and better persistence of CD4 than CD8 T cells. *J Virol* 78:3811-6.
- 447 9. Hammarlund E, Lewis MW, Hanifin JM, Mori M, Koudelka CW, Slifka MK. 2010. Antiviral  
448 immunity following smallpox virus infection: a case-control study. *J Virol* 84:12754-60.
- 449 10. Nyendak MR, Park B, Null MD, Baseke J, Swarbrick G, Mayanja-Kizza H, Nsereko M, Johnson DF,  
450 Gitta P, Okwera A, Goldberg S, Bozeman L, Johnson JL, Boom WH, Lewinsohn DA, Lewinsohn  
451 DM, Tuberculosis Research U, the Tuberculosis Trials C. 2013. Mycobacterium tuberculosis  
452 specific CD8(+) T cells rapidly decline with antituberculosis treatment. *PLoS One* 8:e81564.
- 453 11. Axelsson-Robertson R, Rao M, Loxton AG, Walzl G, Bates M, Zumla A, Maeurer M. 2015.  
454 Frequency of Mycobacterium tuberculosis-specific CD8+ T-cells in the course of anti-tuberculosis  
455 treatment. *Int J Infect Dis* 32:23-9.
- 456 12. Chentoufi AA, Kritzer E, Yu DM, Nesburn AB, Benmohamed L. 2012. Towards a rational design of  
457 an asymptomatic clinical herpes vaccine: the old, the new, and the unknown. *Clin Dev Immunol*  
458 2012:187585.
- 459 13. Calarota SA, Baldanti F. 2013. Enumeration and characterization of human memory T cells by  
460 enzyme-linked immunospot assays. *Clin Dev Immunol* 2013:637649.
- 461 14. Schoffelen T, Sprong T, Bleeker-Rovers CP, Wegdam-Blans MC, Ammerdorffer A, Pronk MJ,  
462 Soethoudt YE, van Kasteren ME, Herremans T, Bijlmer HA, Netea MG, van der Meer JW, Joosten  
463 LA, van Deuren M. 2014. A combination of interferon-gamma and interleukin-2 production by  
464 *Coxiella burnetii*-stimulated circulating cells discriminates between chronic Q fever and past Q  
465 fever. *Clin Microbiol Infect* 20:642-50.
- 466 15. Schoffelen T, Textoris J, Bleeker-Rovers CP, Ben Amara A, van der Meer JW, Netea MG, Mege JL,  
467 van Deuren M, van de Vosse E. 2017. Intact interferon-gamma response against *Coxiella burnetii*  
468 by peripheral blood mononuclear cells in chronic Q fever. *Clin Microbiol Infect* 23:209 e9-209  
469 e15.

- 470 16. Limonard GJ, Thijsen SF, Bossink AW, Asscheman A, Bouwman JJ. 2012. Developing a new  
471 clinical tool for diagnosing chronic Q fever: the Coxiella ELISPOT. *FEMS Immunol Med Microbiol*  
472 64:57-60.
- 473 17. Brodsky FM, Lem L, Solache A, Bennett EM. 1999. Human pathogen subversion of antigen  
474 presentation. *Immunol Rev* 168:199-215.
- 475 18. Gorvel L, Ben Amara A, Ka MB, Textoris J, Gorvel JP, Mege JL. 2014. Myeloid decidual dendritic  
476 cells and immunoregulation of pregnancy: defective responsiveness to *Coxiella burnetii* and  
477 *Brucella abortus*. *Front Cell Infect Microbiol* 4:179.
- 478 19. Gorvel L, Textoris J, Banchereau R, Ben Amara A, Tantibhedhyangkul W, von Bargen K, Ka MB,  
479 Capo C, Ghigo E, Gorvel JP, Mege JL. 2014. Intracellular bacteria interfere with dendritic cell  
480 functions: role of the type I interferon pathway. *PLoS One* 9:e99420.
- 481 20. Boyman O, Sprent J. 2012. The role of interleukin-2 during homeostasis and activation of the  
482 immune system. *Nat Rev Immunol* 12:180-90.
- 483 21. Mahnke YD, Brodie TM, Sallusto F, Roederer M, Lugli E. 2013. The who's who of T-cell  
484 differentiation: human memory T-cell subsets. *Eur J Immunol* 43:2797-809.
- 485 22. Wegdam-Blans MC, Kampschreur LM, Delsing CE, Bleeker-Rovers CP, Sprong T, van Kasteren  
486 ME, Notermans DW, Renders NH, Bijlmer HA, Lestrade PJ, Koopmans MP, Nabuurs-Franssen  
487 MH, Oosterheert JJ, Dutch QfCG. 2012. Chronic Q fever: review of the literature and a proposal  
488 of new diagnostic criteria. *J Infect* 64:247-59.
- 489 23. Karagiannis I, Schimmer B, Van Lier A, Timen A, Schneeberger P, Van Rotterdam B, De Bruin A,  
490 Wijkmans C, Rietveld A, Van Duynhoven Y. 2009. Investigation of a Q fever outbreak in a rural  
491 area of The Netherlands. *Epidemiol Infect* 137:1283-94.
- 492 24. Morroy G, Van Der Hoek W, Nanver ZD, Schneeberger PM, Bleeker-Rovers CP, Van Der Velden J,  
493 Coutinho RA. 2016. The health status of a village population, 7 years after a major Q fever  
494 outbreak. *Epidemiol Infect* 144:1153-62.
- 495 25. Moise L, Gutierrez A, Kibria F, Martin R, Tassone R, Liu R, Terry F, Martin B, De Groot AS. 2015.  
496 iVAX: An integrated toolkit for the selection and optimization of antigens and the design of  
497 epitope-driven vaccines. *Hum Vaccin Immunother* 11:2312-21.
- 498 26. Moise L, Gutierrez AH, Bailey-Kellogg C, Terry F, Leng Q, Abdel Hady KM, VerBerkmoes NC,  
499 Sztejn MB, Losikoff PT, Martin WD, Rothman AL, De Groot AS. 2013. The two-faced T cell  
500 epitope: examining the host-microbe interface with JanusMatrix. *Hum Vaccin Immunother*  
501 9:1577-86.

502

## 503 **Figure legends**

504 **Figure 1. Cultured ELISpot human IFN $\gamma$  responses to HLA class I and II peptides in**  
505 **individuals treated for chronic Q fever.** Individual IFN $\gamma$  responses to (A) HLA class II and (B)  
506 class I peptides determined by cultured ELISpot are depicted as stimulation indices (SI). Each  
507 column shows data from one donor, each row responses to one of the 50 class II or 65 class I  
508 peptides. Responses not significantly different from background and/or lower than an average of  
509 10 spots/well are denoted as 0. Significant responses with a  $SI \geq 2$  are color coded as per heatmap  
510 legend. Responses for one donor were capped at  $SI=50$  to be able to properly resolve the  
511 magnitude of responses of the remaining subjects.

512

513 **Figure 2. Cumulative HLA class II peptide responses in chronic compared to convalescent**  
514 **individuals.** Data are shown for past asymptomatic (n=33) or symptomatic (n=23) infected  
515 individuals and for chronic Q fever subjects (n=14) as the cumulative peptide response ( $SI \geq 2$ )  
516 per donor (A) or as the proportion of subjects recognizing 0, 1-2, 3-5, 6-10 or >10 peptides (B).  
517 Whisker-dot-plots show the median and interquartile range (25<sup>th</sup> and 75<sup>th</sup> percentile) with  
518 whiskers extending from min to max values.

519

520 **Figure 3. Class II peptide antigenicity patterns in chronic and convalescent individuals.**  
521 Data are shown as the number (A) and proportion (B) of individuals with IFN $\gamma$  responses to the  
522 50 individual peptides in the chronic (n=14; grey bars) and convalescent cohorts (both past  
523 asymptomatic and symptomatic; n=56; black bars), as determined by cultured ELISpot. Bars  
524 extending over dotted lines indicate those peptides that were recognized by more than 10% of  
525 chronic ( $\geq 2/14$ ) or convalescent subjects ( $> 5/56$ ). Asterices indicate significant difference in  
526 proportion between the two groups by Fisher's exact test. \*  $p < 0.05$ ; \*\*  $p < 0.01$



527

528 **Figure 4. Direct ELISpot human IFN $\gamma$  responses to HLA class II peptides.** IFN $\gamma$  responses to  
529 individual HLA class II peptides were determined by direct ELISpot for (A) convalescent  
530 individuals with a past history of symptomatic (n=7) or asymptomatic (n=4) Q fever infection  
531 and (B) individuals with chronic Q fever (n=13). Data are depicted as stimulation indices (SI) for  
532 all subjects analyzed. Each column shows data from one donor, each row responses to one of the  
533 50 class II peptides. Responses not significantly different from background and/or lower than an  
534 average of 10 spots/million cells plated are denoted as blanks. Significant responses with a  $SI \geq 2$   
535 are color coded as per heatmap legend.

536 **Table 1. Chronic Q fever cohort**

| Subject | Gender | Age at inclusion | Chronic Q fever category | Year of diagnosis | Site of focalized infection | Still antibiotic treatment at inclusion | IgG phase I titer at inclusion | IgG phase II titer at inclusion | <i>C. burnetii</i> -specific IFN $\gamma$ response in pg/ml at inclusion | Tested for class I reactivity | Tested for class II reactivity |
|---------|--------|------------------|--------------------------|-------------------|-----------------------------|-----------------------------------------|--------------------------------|---------------------------------|--------------------------------------------------------------------------|-------------------------------|--------------------------------|
| 1       | M      | 75               | proven                   | 2017              | vascular, bone              | yes                                     | >4096                          | >4096                           | 10498                                                                    | yes                           | yes                            |
| 2       | M      | 57               | proven                   | 2016              | bone                        | yes                                     | 8192                           | 4096                            | 1288                                                                     | no                            | no                             |
| 3       | M      | 74               | proven                   | 2014              | vascular                    | yes                                     | 8192                           | 8192                            | 603                                                                      | yes                           | yes                            |
| 4       | M      | 76               | proven                   | 2016              | vascular                    | yes                                     | 2048                           | 4096                            | 5237                                                                     | yes                           | yes                            |
| 5       | M      | 71               | proven                   | 2014              | lung, possible vascular     | no                                      | 4096                           | 4096                            | 4951                                                                     | yes                           | no                             |
| 6       | M      | 79               | proven                   | 2016              | vascular                    | yes                                     | 2048                           | 2048                            | 499                                                                      | yes                           | yes                            |
| 7       | M      | 79               | proven                   | 2010              | vascular                    | yes                                     | 4096                           | 2048                            | 1042                                                                     | yes                           | yes                            |
| 8       | M      | 72               | proven                   | 2009              | vascular                    | no                                      | 512                            | 1024                            | 553                                                                      | no                            | yes                            |
| 9       | M      | 63               | proven                   | 2017              | vascular, endocarditis      | yes                                     | 2048                           | 2048                            | 4395                                                                     | no                            | yes                            |
| 10      | M      | 72               | proven                   | 2010              | unknown (PCR+)              | yes                                     | 8192                           | 8192                            | 2778                                                                     | yes                           | yes                            |
| 11      | M      | 68               | proven                   | 2009              | vascular                    | yes                                     | 8192                           | 4096                            | 5150                                                                     | no                            | yes                            |
| 12      | M      | 60               | proven                   | 2013              | endocarditis                | yes                                     | 16384                          | 8192                            | 4030                                                                     | yes                           | yes                            |
| 13      | M      | 72               | proven                   | 2017              | vascular                    | yes                                     | 32                             | 512                             | 470                                                                      | no                            | no                             |
| 14      | M      | 74               | proven                   | 2016              | vascular                    | yes                                     | 2048                           | 4096                            | 474                                                                      | yes                           | yes                            |
| 15      | M      | 76               | proven                   | 2016              | vascular                    | yes                                     | 16384                          | 32768                           | 34                                                                       | no                            | yes                            |
| 16      | M      | 71               | proven                   | 2011              | vascular                    | no                                      | 4096                           | 4096                            | 3345                                                                     | yes                           | yes                            |
| 17      | M      | 72               | probable                 | 2015              | n.d.                        | yes                                     | 32768                          | 32768                           | 3804                                                                     | yes                           | yes                            |
| 18      | M      | 59               | probable                 | 2015              | n.d.                        | no                                      | 2048                           | 2048                            | 24                                                                       | no                            | no                             |
| 19      | F      | 73               | probable                 | 2010              | n.d.                        | no                                      | 1024                           | 1024                            | 51                                                                       | yes                           | no                             |
| 20      | M      | 67               | probable                 | 2016              | n.d.                        | no                                      | 1024                           | 2048                            | 32                                                                       | no                            | no                             |
| 21      | M      | 66               | probable                 | 2013              | n.d.                        | no                                      | 1024                           | 2048                            | 4173                                                                     | yes                           | no                             |
| 22      | M      | 79               | probable                 | 2016              | n.d.                        | no                                      | 4096                           | 4096                            | 118                                                                      | no                            | no                             |

537

538 <sup>1</sup> At inclusion into the study in March/April 2018

539 <sup>2</sup> At inclusion into the study in March/April 2018, medium only background subtracted

540 <sup>3</sup> Serum was not diluted further, so end titer is not known

541 n.d. not detected

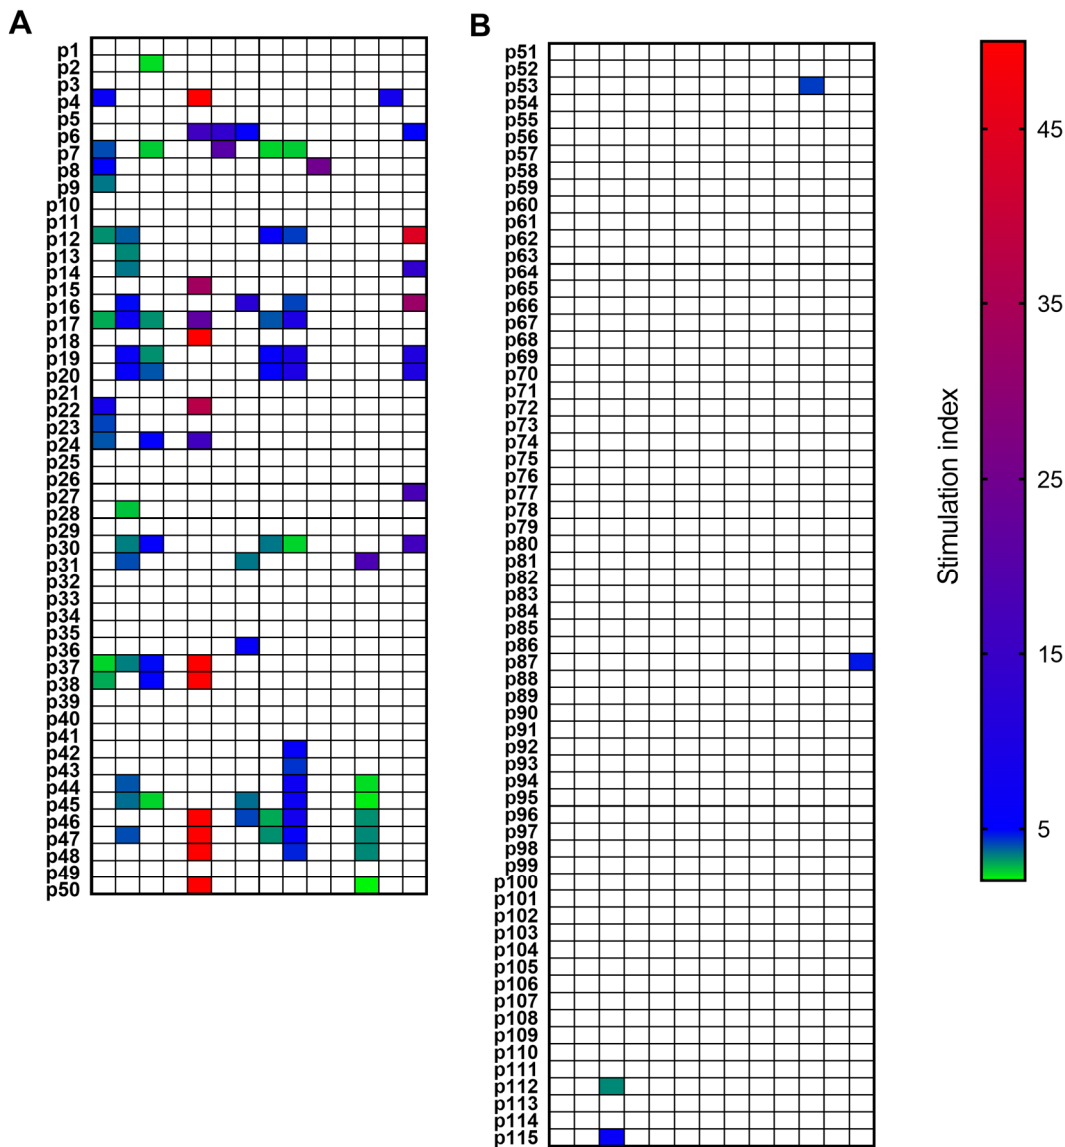

1  
2 **Figure 1. Cultured ELISpot human IFN $\gamma$  responses to HLA class I and II peptides in**  
3 **individuals treated for chronic Q fever.** Individual IFN $\gamma$  responses to (A) HLA class II and (B)  
4 class I peptides determined by cultured ELISpot are depicted as stimulation indices (SI). Each  
5 column shows data from one donor, each row responses to one of the 50 class II or 65 class I  
6 peptides. Responses not significantly different from background and/or lower than an average of  
7 10 spots/well are denoted as 0. Significant responses with a  $SI \geq 2$  are color coded as per heatmap  
8 legend. Responses for one donor were capped at  $SI=50$  to be able to properly resolve the magnitude  
9 of responses of the remaining subjects.

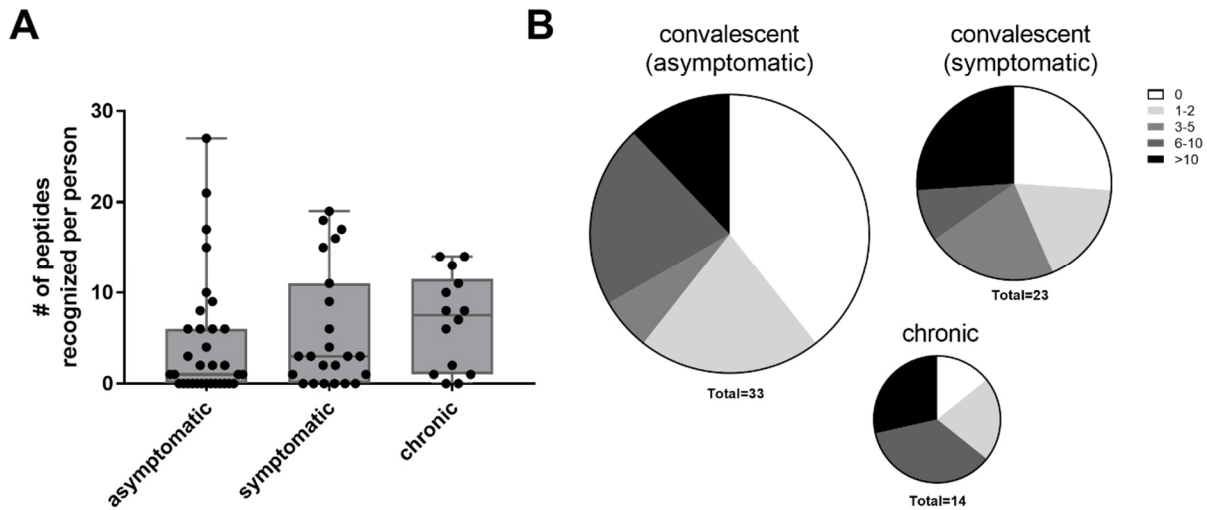

10

11 **Figure 2. Cumulative HLA class II peptide responses in chronic compared to convalescent**  
12 **individuals.** Data are shown for past asymptomatic (n=33) or symptomatic (n=23) infected  
13 individuals and for chronic Q fever subjects (n=14) as the cumulative peptide response (SI $\geq$ 2) per  
14 donor (A) or as the proportion of subjects recognizing 0, 1-2, 3-5, 6-10 or >10 peptides (B).  
15 Whisker-dot-plots show the median and interquartile range (25<sup>th</sup> and 75<sup>th</sup> percentile) with whiskers  
16 extending from min to max values.

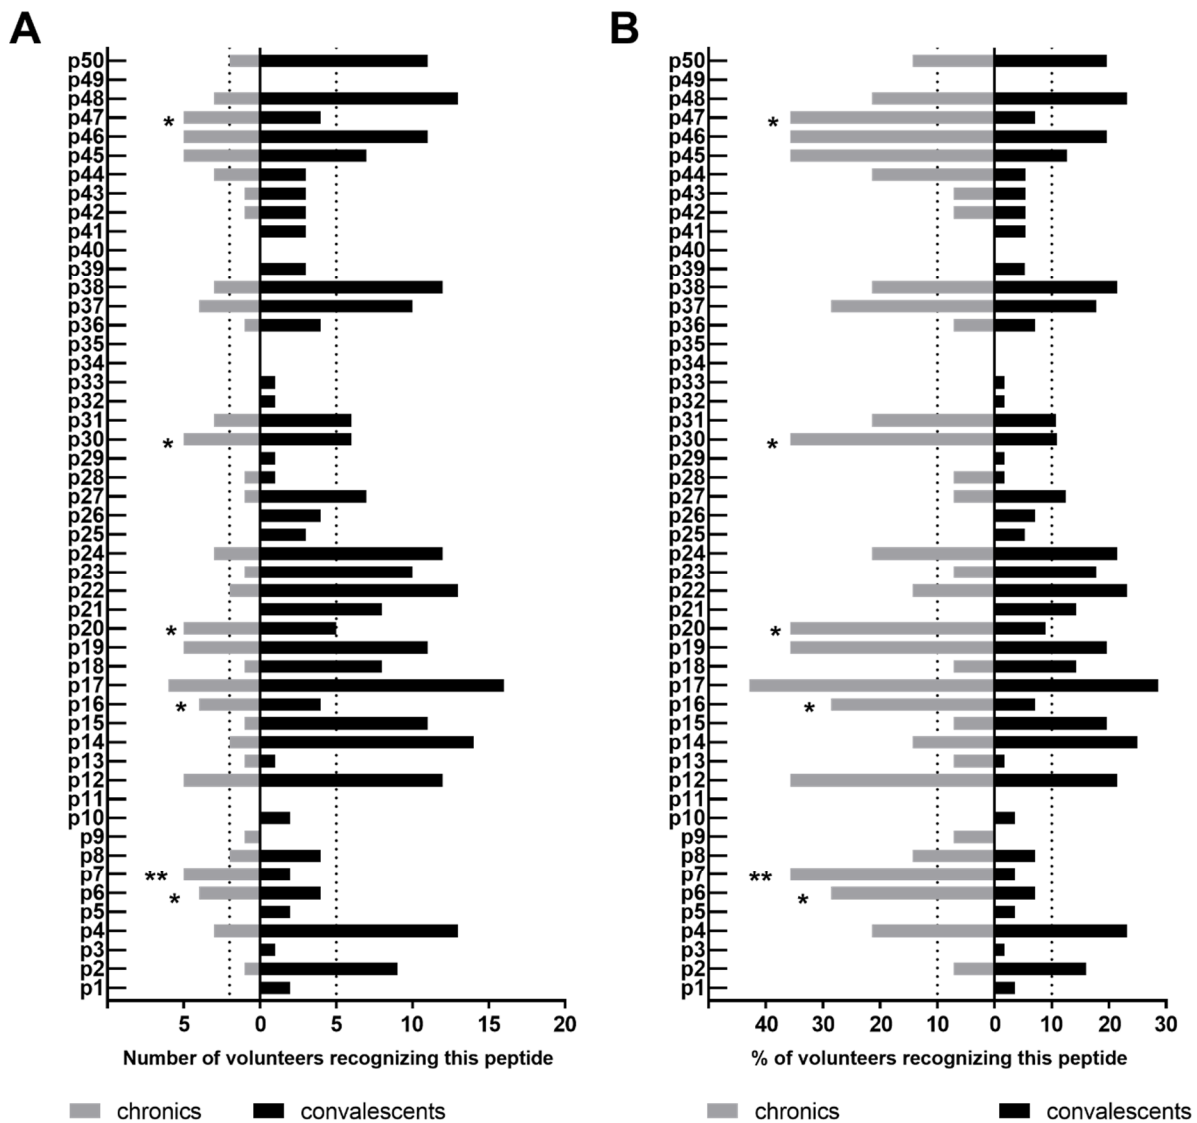

17

18 **Figure 3. Class II peptide antigenicity patterns in chronic and convalescent individuals.** Data

19 are shown as the number (A) and proportion (B) of individuals with IFN $\gamma$  responses to the 50

20 individual peptides in the chronic (n=14; grey bars) and convalescent cohorts (both past

21 asymptomatic and symptomatic; n=56; black bars), as determined by cultured ELISpot. Bars

22 extending over dotted lines indicate those peptides that were recognized by more than 10% of

23 chronic ( $\geq 2/14$ ) or convalescent subjects ( $> 5/56$ ). Asterices indicate significant difference in

24 proportion between the two groups by Fisher's exact test. \* p<0.05; \*\* p<0.01

25

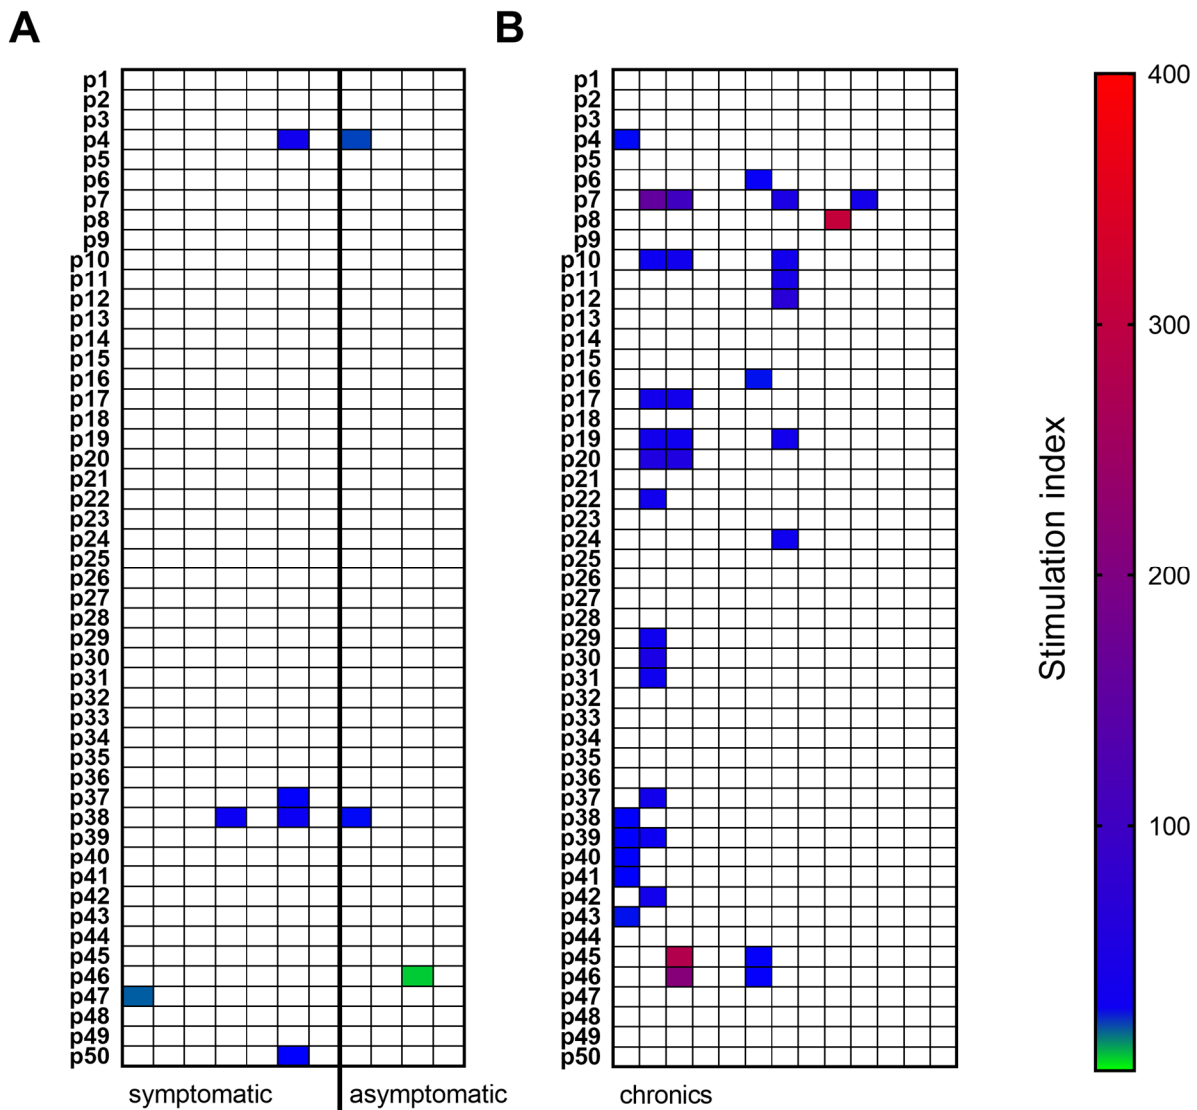

26

27 **Figure 4. Direct ELISpot human IFN $\gamma$  responses to HLA class II peptides.** IFN $\gamma$  responses to  
28 individual HLA class II peptides were determined by direct ELISpot for (A) convalescent  
29 individuals with a past history of symptomatic (n=7) or asymptomatic (n=4) Q fever infection and  
30 (B) individuals with chronic Q fever (n=13). Data are depicted as stimulation indices (SI) for all  
31 subjects analyzed. Each column shows data from one donor, each row responses to one of the 50  
32 class II peptides. Responses not significantly different from background and/or lower than an  
33 average of 10 spots/million cells plated are denoted as blanks. Significant responses with a SI $\geq$ 2  
34 are color coded as per heatmap legend.
